# Supplementary material for: Library of Disordered Patterns in 3D Protein Structures
Source: PLoS Comput Biol. 2010 Oct 14;6(10):e1000958. doi: 10.1371/journal.pcbi.1000958 (PMC2954861; doi:10.1371/journal.pcbi.1000958)
Supplement: Dataset S1 — The list of patterns and their properties. (0.05 MB XLS) [file pcbi.1000958.s001.xls]

## Sheet: table 1
Pattern's index	Number of proteins with the pattern at first 40 residues (N-tail)	Number of proteins with the pattern at terminal 40 residue (C-tail)	Number of proteins with the pattern far from N,C-tails of proteins	Number of proteins with the pattern	Number of groups of proteins with identity lower than 90%	Number of groups of proteins with identity lower than 20%	q(A,N), Probability that pattern A matches a random sequence of length N, an upper bound. See #.1. Number of occurrences	p(A,N), Probability that pattern A matches a random sequence of length N. See #.1. Number of occurrences	Z(A,N), Statistical significance of pattern A. See #.1. Number of occurrences	DTP, Number of disordered residues	-DTN Number of ordered residues	Number of disordered residues for the given pattern without consideration of the terminal residues	Number of ordered residues for the given pattern without consideration of the terminal residues	N(A), Number of fragments, See #.3. Significance of disordered occurrences	Nd(A), Number of disordered fragments, See #.3. Significance of disordered occurrences	Z-score, See #.3. Significance of disordered occurrences	occurrence in human proteome	occurrence in drosophila (fruit fly) proteome	occurrence in c.elegance proteome	occurrence in E.coli (strains O6-K15-H31) proteome	occurrence in L.lactis proteome	occurrence in M.tuberculosis (ATCC 25177) proteome	Pattern length	Pattern
1	3069	2670	10	5423	4324	1227	6.98518e-06	6.88824e-06	11050.2	39486.6	2444.45	30637.3	2313.68	5441	4991	350.764	99	133	57	0	0	0	6	HHHHHH
2	669	51	6	726	667	277	0.000132368	0.00013236	337.327	6721.67	1329.33	3228.67	1127.33	727	496	94.0351	3	0	0	0	0	0	6	ENLYFQ
3	759	41	27	821	638	276	0.000711915	0.000711673	160.649	6339.89	1606.11	4023.1	932.897	827	664	119.007	4	0	0	0	0	0	6	LVPRGS
4	2	1090	0	1092	894	451	5.83915e-05	5.83899e-05	767.676	1605.98	692.022	5412.76	1139.24	1094	888	138.446	0	0	0	0	0	0	6	LEHHHH
5	104	0	0	104	79	69	1.46097e-08	1.46097e-08	4590.2	1266.18	30.821	1113.43	30.571	104	101	54.4702	0	0	0	0	0	0	11	ASMTGGQQMGR
6	83	0	0	83	81	55	6.75601e-18		1.69936e+08	1066.42	95.583	1642.88	100.125	83	81	59.3039	0	0	0	0	0	0	21	AHHHHHHMGTLEAQTQGPGSM
7	1	603	0	604	577	207	3.04213e-06	3.04213e-06	1861.96	978.45	206.55	3810.03	417.974	604	549	113.512	0	0	0	0	0	0	7	EGRHHHH
8	531	1	2	531	413	202	2.92882e-14	2.92882e-14	1.66819e+07	770.179	296.821	7303.41	706.588	534	497	127.841	0	0	0	0	0	0	15	HHHHSSGLVPRGSHM
11	35	13	124	120	81	60	0.00106688	0.00106183	13.5683	743.833	722.167	548.5	382.5	137	76	32.7711	1	4	5	2	0	0	6	GGKGGG
15	10	35	19	64	22	17	0.000596331	0.000596144	9.36614	582.952	201.048	236.952	147.048	64	40	25.43	17	4	1	0	0	1	6	APAPSA
18	30	7	27	56	30	26	0.000405933	0.000404992	10.9665	541.346	455.654	191.558	154.442	56	31	20.9046	27	8	13	0	0	0	6	KKKGKK
21	20	15	9	32	16	15	0.000111278	0.000108495	13.8722	480.5	84.5	150.833	63.167	34	23	20.1539	703	304	247	1	0	11	6	PPPPPP
22	1212	209	2	1418	1108	499	7.52409e-05	7.52382e-05	878.377	447.928	35.072	8421.31	110.689	1422	1401	193.137	4	3	0	0	0	0	6	GSSHHH
25	66	9	20	93	84	66	0.000616694	0.000615182	15.3504	442.783	407.217	384.283	179.717	93	64	33.9406	67	35	19	0	0	2	6	GSSGSS
26	8	5	15	28	26	21	0.000459011	0.00045891	2.81172	429	178	107	61	28	18	17.33	0	0	0	1	0	0	6	DDDDKA
27	19	18	24	55	45	39	0.000604102	0.000602049	7.27399	426.062	363.938	221.521	117.479	55	35	24.0288	242	42	54	0	0	0	6	EEEDEE
28	259	0	3	259	193	132	7.52409e-05	7.52353e-05	158.613	402.506	135.494	1382.84	177.161	259	232	74.6591	0	1	0	0	0	0	6	HHHSGS
32	48	8	16	72	61	47	0.000564339	0.000564186	11.6924	365.042	326.958	254.125	177.875	72	41	24.43	4	0	0	0	0	0	6	LYKKAG
35	136	3	16	154	125	100	0.000611142	0.000610963	28.7573	360.433	270.567	737.598	192.402	155	123	50.8932	0	0	0	0	0	2	6	GSAMAS
40	11	43	0	54	32	25	7.48717e-05	7.4869e-05	31.3888	314.25	27.75	306.25	17.75	54	51	36.0201	0	0	0	0	0	0	6	KGEHHH
42	22	9	25	56	29	28	0.000617951	0.000617696	7.30537	320.429	231.571	210.929	125.071	56	36	24.5084	12	4	11	0	0	0	6	DEEAEE
43	0	141	1	142	118	104	4.37788e-09	4.37649e-09	11479	306.751	123.249	1338.15	223.854	142	121	55.5811	0	0	0	0	0	0	11	AAALGHHHHHH
45	17	3	10	30	18	17	0.000447664	0.000447315	3.45599	304.748	161.252	91.385	88.615	30	15	13.718	121	44	34	4	0	6	6	APAPAP
46	35	10	0	45	27	25	3.03136e-05	3.03131e-05	42.0263	296.983	42.017	272.983	42.017	45	41	31.0605	0	0	0	0	0	0	7	SGHIEGR
47	1	25	1	27	22	14	2.1648e-07	2.1648e-07	300.924	290.5	63.5	205	38	27	23	23.3114	1	0	0	0	0	0	9	EQKLISEED
48	29	17	1	47	33	29	1.69736e-05	1.69734e-05	59.3791	289.242	39.758	289.242	39.758	47	41	30.3352	1	0	0	0	0	0	7	DYKDDDD
49	16	27	0	43	37	34	1.75977e-07	1.75977e-07	539.232	288.5	46.5	300.167	43.833	43	36	29.4382	0	0	0	0	0	0	8	WSHPQFEK
50	3	21	7	31	19	18	0.000140788	0.00014076	11.4174	290	86	150.5	35.5	31	24	22.1789	62	24	32	0	0	2	6	PPPPPK
56	550	0	1	550	490	313	9.90273e-06	9.90263e-06	939.17	278.86	274.14	2672.4	629.6	550	445	97.8343	0	0	0	0	0	0	6	HHHSHM
58	55	1	3	59	43	37	0.000204502	0.000204482	19.1944	266.188	109.812	263.688	90.312	59	44	29.4196	0	1	0	0	0	0	6	GPLGSM
65	21	4	21	46	38	25	0.000614752	0.000614565	5.17509	240.167	141.833	170.5	105.5	46	27	20.1677	14	4	3	0	0	0	6	PGSSGG
66	417	9	1	427	392	182	1.61255e-05	1.61254e-05	570.698	240.95	174.05	2173.98	815.02	427	296	71.8272	0	0	0	0	0	0	7	ENLYFQG
76	1	7	13	21	11	9	0.000290227	0.0002898	3.16161	211	58	68	58	21	11	12.0658	8	0	2	1	1	0	6	RRGKKK
77	21	2	6	29	19	17	0.000397244	0.000397117	3.86808	207.405	48.595	125.405	48.595	29	21	19.9976	0	0	0	0	0	0	6	VDDDDK
78	24	0	1	25	19	16	2.03478e-06	2.03478e-06	90.3648	204.449	20.551	181.449	18.551	25	23	24.7577	0	0	0	0	0	0	8	LYDDDDKD
84	3	14	9	26	17	15	0.000312084	0.000311496	4.34402	197.333	164.667	86.167	69.833	26	13	12.7708	1	0	2	0	0	0	6	PEDPED
89	5	4	27	36	15	14	0.000492053	0.000491837	4.38228	191.039	151.961	127.039	88.961	36	22	18.623	0	2	3	0	0	0	6	PGGMGG
94	29	0	8	37	31	28	0.000485974	0.00048586	4.7052	187.5	145.5	126.85	95.15	37	21	17.4513	1	0	0	0	0	0	6	LGSPEF
95	1250	8	0	1252	1054	383	4.55442e-05	4.55433e-05	997.293	179.217	42.783	7305.65	242.353	1258	1214	177.792	0	2	0	0	0	0	6	HHHHSG
98	4	11	21	29	25	23	0.000525687	0.000525465	2.32244	184.5	167.5	126.5	72.5	33	20	17.6737	97	27	42	1	0	1	6	EDEDEE
100	166	0	0	166	154	64	4.25983e-19		1.36177e+09	179.425	146.575	3151.72	500.275	166	155	84.2214	0	0	0	0	0	0	22	HHHHHHSSGVDLGTENLYFQSM
103	12	4	123	40	26	9	9.91206e-06	9.88438e-06	66.1426	169.667	14.333	487.333	87.667	59	50	34.9224	14	7	4	3	0	0	8	GGGSSGGG
114	27	118	3	148	125	107	7.8568e-05	7.85092e-05	87.6909	161.233	26.767	846.275	41.725	148	142	60.6171	1	0	0	0	0	0	6	GGRHHH
117	7	12	2	19	12	12	0.000280392	0.000280323	2.68215	162.75	122.25	64.25	53.75	19	11	12.7732	25	6	7	0	0	0	6	KKRKRK
123	32	7	5	41	31	29	0.000206992	0.000206972	12.3065	159.167	134.833	148.833	115.167	42	23	17.8958	0	0	2	0	0	0	6	GINPFT
126	8	11	6	25	22	17	0.00026763	0.000267595	4.86605	153	81	93.167	56.833	25	15	15.2196	0	3	0	0	0	0	6	PNSSSV
132	109	0	0	109	98	68	2.41399e-05	2.41396e-05	117.495	149.308	120.692	459.783	194.217	109	73	35.7056	0	0	0	0	0	0	6	YFQGHM
133	40	0	12	52	37	34	0.000353664	0.000353605	11.1188	148.325	104.675	206.325	105.675	52	33	23.2963	0	0	0	0	0	0	6	GSMMAA
141	61	0	0	61	59	48	1.40447e-18		2.72717e+08	142.619	112.381	1127.89	214.108	61	55	49.2612	0	0	0	0	0	0	22	HHHHSSGVDLGTENLYFQSNAM
145	13	7	1	21	17	16	0.000152735	0.000152724	6.4234	130	2	124	2	21	21	23.8356	0	0	0	0	0	0	6	DDDDKH
152	2	5	9	16	15	14	0.000398071	0.000397943	0.345885	128.85	39.15	61.85	34.15	16	10	12.715	53	31	26	1	0	0	6	DDEDED
154	3	10	8	21	12	12	0.000548136	0.000547992	0.255235	130.733	84.267	83.333	42.667	21	14	15.5967	26	6	9	0	0	0	6	EEEEAP
159	10	4	11	17	13	11	3.74243e-05	3.66841e-05	12.9529	128.792	113.208	77.792	39.208	18	12	14.4398	331	869	249	2	0	1	6	QQQQQQ
163	6	7	19	29	23	17	0.00010892	0.000108888	12.515	126.5	92.5	140.5	75.5	30	20	18.2686	78	80	8	1	0	2	7	GGGGGSG
175	18	3	2	23	22	18	3.71127e-06	3.71126e-06	61.1571	118.917	84.083	115.417	68.583	23	14	15.4109	0	0	0	0	0	0	8	LEVLFQGP
183	15	6	12	32	18	17	0.000427345	0.000427043	4.24093	115.958	75.042	133.872	64.128	33	23	20.4904	5	0	4	0	0	0	6	KKGEKK
185	67	0	0	67	48	44	7.61811e-10	7.61811e-10	12880.6	112.964	24.036	762.393	41.607	67	65	46.1924	0	0	0	0	0	0	12	SMTGGQQMGRGS
186	6	19	6	31	15	14	0.000169908	0.000169885	9.97842	115.015	60.985	115.015	70.985	31	18	16.3666	12	9	1	0	0	0	6	PPEPPK
202	246	122	0	368	313	217	3.20789e-05	3.20778e-05	347.993	106.738	80.263	2029.02	178.979	368	339	91.6257	4	0	0	0	0	0	6	AHHIHH
206	34	0	0	34	28	21	6.90208e-10	6.90208e-10	6766.14	100.042	15.958	369.15	38.85	34	31	30.8652	0	0	0	0	0	0	12	PTTENLYFQGAM
208	25	1	0	26	8	7	0.000149092	0.000149081	8.76271	102.396	72.604	107.25	48.75	26	20	20.1752	0	0	0	0	0	0	6	GSHMKN
214	109	0	0	109	83	73	7.16476e-07	7.16476e-07	687.133	98.406	41.594	692.844	70.156	109	103	50.2125	0	0	0	0	0	0	7	HHHHHMA
227	14	8	115	50	30	17	0.000103299	0.000103269	24.084	96.161	87.839	436.333	131.667	64	47	29.5522	14	23	6	0	0	0	7	GGSGSGG
235	187	670	4	860	790	363	3.71053e-05	3.7104e-05	758.496	88.667	41.333	4780.28	381.715	860	788	139.291	0	8	2	0	0	0	6	GHGHHH
237	35	0	0	35	24	21	7.67728e-10	7.67728e-10	6609.86	85.8	8.2	372.667	12.333	35	34	31.6085	0	0	0	0	0	0	11	SHHHHHHSQDP
240	1237	329	5	1566	1211	558	1.62195e-05	1.62187e-05	2092.48	87.798	40.202	9220.96	199.044	1570	1537	201.603	19	27	12	0	0	0	6	SHHHHH
244	12	0	3	15	7	7	2.61073e-05	2.6107e-05	13.8109	84.769	17.231	87.769	17.231	15	14	18.3887	0	0	0	0	0	0	7	AMADIGS
255	42	0	8	50	33	25	0.000354081	0.000354021	10.5355	82.885	71.115	222.385	77.615	50	36	26.1003	0	0	0	1	0	0	6	GSHMLE
262	0	69	1	70	59	53	6.77534e-10	6.77534e-10	14279.1	78.7	51.3	679.642	160.358	70	54	37.2495	0	0	0	0	0	0	12	KLAAALEHHHHH
282	15	0	2	17	14	13	0.000131068	0.00013106	5.40316	72.667	50.333	76	26	17	12	14.905	0	0	0	0	0	0	6	DDDDKM
284	3	5	12	17	13	12	9.66838e-05	9.66346e-05	6.9401	73	63	91.75	42.25	18	13	15.3993	20	17	5	0	0	2	7	SGGGSGG
286	15	0	0	15	11	10	4.32566e-05	4.32558e-05	10.2454	70.333	10.667	76.333	13.667	15	13	17.3595	0	1	0	0	0	0	6	HHHHGK
288	3	6	7	16	12	12	0.000488038	0.000487849	-0.443819	72.25	68.75	65.25	30.75	16	11	14.0634	83	26	39	0	0	0	6	DEEEED
289	3	44	0	47	32	23	5.74964e-05	5.74948e-05	31.2712	70	15	268.5	13.5	47	44	33.2985	0	0	0	0	0	0	6	GRDHHH
299	0	49	0	49	39	22	2.21705e-07	2.19889e-07	549.037	66.908	27.092	336.243	55.757	49	46	35.3946	3	2	0	0	0	0	8	AAAHHHHH
307	16	0	0	16	13	12	0.00013774	0.00013773	4.70614	64.4	15.6	75.1	20.9	16	12	15.4118	2	0	0	0	0	0	6	GSHMSQ
315	0	91	1	92	80	73	7.46546e-05	7.46519e-05	55.1303	64.525	60.475	420.142	131.858	92	63	33.5823	0	2	0	0	0	0	6	SLPHHH
316	33	0	0	33	31	29	2.39097e-06	2.39096e-06	111.189	61.417	12.583	192.958	71.042	33	24	22.2628	0	0	0	0	0	0	8	ENLYFGGS
319	4	1	45	29	21	10	9.00688e-05	9.00486e-05	14.1311	61.667	29.333	258	56	35	28	23.9107	31	19	2	0	0	0	7	SGGGGSG
322	15	1	2	18	13	9	0.000116516	0.000116509	6.47994	62.25	54.75	70.667	55.333	18	10	11.6537	0	1	0	0	0	0	7	GGGGGIL
329	0	99	0	99	84	72	1.11841e-08	1.11841e-08	4991.61	58.778	30.222	841.978	49.022	99	97	51.6244	0	0	0	0	0	0	9	EGGSHHHHH
337	701	8	2	705	563	245	0.000368371	0.000368306	194.055	59.167	57.833	3874.62	391.378	711	632	122.712	1	0	0	0	0	0	6	SGEVPR
338	16	0	5	21	18	16	0.000153552	0.000153541	6.39405	58.25	36.75	89.25	36.75	21	16	17.9507	0	0	0	0	0	0	6	GPGSMT
340	1	216	0	217	172	152	2.09629e-07	2.09629e-07	2541.15	58.292	49.708	1474.31	261.695	217	181	65.8756	0	0	0	0	0	0	8	ALEHHHHH
344	21	0	6	27	21	18	0.000228092	0.000228024	6.47032	58.071	49.929	99.071	62.929	27	15	14.571	1	0	0	0	0	0	6	GSHWGS
345	36	90	0	126	96	80	1.54048e-05	1.54041e-05	170.826	57.121	40.879	646.459	109.541	126	104	47.8141	2	11	5	0	0	0	6	KHHHHH
347	207	3	3	213	197	82	8.34074e-05	8.34041e-05	123.35	57.167	47.833	1203.45	74.55	213	199	70.7374	1	1	2	0	0	0	6	HHSSGR
358	11	0	4	15	11	11	0.000247863	0.000247834	1.86754	54.125	39.875	50.625	39.375	15	8	10.3964	0	0	0	0	0	0	6	GSHMGT
359	36	0	0	36	27	25	2.70391e-06	2.70391e-06	114.349	53	35	207	45	36	31	26.1922	0	0	0	0	0	0	7	HIEGRHM
361	2	39	0	41	28	25	4.21102e-06	4.21101e-06	104.618	51.5	9.5	258.712	28.288	41	37	29.3537	0	0	0	0	0	0	7	SGAHHHH
366	64	1	0	65	51	49	2.63304e-05	2.63301e-05	66.2327	52.542	43.458	332.583	57.417	65	57	36.5827	0	2	0	0	0	0	6	HHHGSM
367	23	1	2	26	25	22	0.000171093	0.000171072	7.86774	51.833	31.167	104.375	51.625	26	18	18.0596	0	0	0	0	0	1	6	GPGSMS
368	17	0	1	18	14	12	0.000104097	0.000104092	7.08153	52.27	35.73	71.551	36.449	18	8	9.35462	0	0	0	0	0	0	6	SHMNAP
387	1	28	0	29	23	18	2.2535e-06	2.25346e-06	100.194	47	8	187	16	29	28	26.4865	0	1	0	0	0	0	7	SRSHHHH
388	20	0	3	23	21	19	0.000188833	0.000188816	6.07335	48	41	101	37	23	17	18.197	0	0	0	0	0	0	6	MDSPDL
389	0	36	2	38	37	32	6.48036e-05	6.48016e-05	23.2645	46.733	10.267	204.608	23.392	38	34	28.5635	0	0	0	0	0	0	6	DEEHHH
396	12	0	0	12	11	11	6.32307e-05	6.32287e-05	5.97552	45.25	20.75	61.25	10.75	12	10	14.904	1	0	0	0	0	0	6	GPGSMM
401	12	0	1	13	10	9	0.000216906	0.000216882	1.65502	44.441	25.559	51.441	26.559	13	8	11.2742	0	0	0	0	0	0	6	GSHMSK
402	0	65	0	65	63	53	3.47778e-06	3.47777e-06	184.515	43.159	14.841	417.098	37.902	65	61	38.4981	0	0	0	0	0	0	7	GEKHHHH
410	0	74	0	74	69	55	7.23253e-05	7.23228e-05	44.6604	42.925	38.075	347.365	96.635	74	54	32.2039	0	0	0	0	0	0	6	KEGHHH
414	1	22	2	25	20	19	1.11486e-05	1.11482e-05	38.0988	40.762	12.238	125.095	24.905	25	21	21.6919	10	14	8	0	0	0	6	NHHHHH
416	56	0	1	57	41	36	8.05271e-05	8.05239e-05	31.9504	41.4	28.6	287.164	54.836	57	48	32.8398	1	0	0	0	0	0	6	HHHSSA
417	55	0	1	56	41	38	2.09923e-05	2.09909e-05	63.8122	40.692	25.308	268.875	67.125	56	45	30.9951	12	9	2	0	0	0	6	HHHHHA
419	9	3	4	16	10	9	8.9403e-05	8.93918e-05	6.79037	40	25	71	25	16	12	15.4118	163	66	32	0	0	3	6	QPPPPP
420	97	3	3	103	81	70	0.00016704	0.000167027	40.1156	39	22	592.5	25.5	103	98	50.1308	0	0	0	0	0	0	6	MASMTG
421	0	41	1	42	42	40	4.50884e-05	4.50875e-05	31.6445	39.2	26.8	201.964	50.036	42	34	27.0506	0	0	2	0	0	0	6	VEHHHH
422	0	62	0	62	57	45	5.23424e-05	5.23411e-05	44.0752	39.589	33.411	301.381	70.619	62	52	34.1056	0	0	0	0	0	0	6	NEGHHH
423	1	11	4	16	9	8	0.000254704	0.000254673	2.10028	38	14	80.5	15.5	16	13	16.7602	0	0	0	0	0	0	6	QPELAP
424	1	18	0	19	10	8	2.27052e-05	2.27049e-05	19.4639	38	23	91	23	19	17	20.1974	2	0	4	0	0	0	6	PRHHHH
